# Supplementary material
Source: PubMed Central journal article supplement (PMC4363115)
Supplement: NIHMS561250-supplement-02.pdf [file NIHMS561250-supplement-02.pdf]

Supplementary Figure S1.

| Gene                                     | Phyre2 Structure Prediction                                                        | Con | Cov | ID % | Template                                                                                 |
|------------------------------------------|------------------------------------------------------------------------------------|-----|-----|------|------------------------------------------------------------------------------------------|
| FhaA (Rv0020c)<br>Actual Structure (ref) |   | n/a | n/a | n/a  | Actual structure                                                                         |
| Rv0097                                   |  | 100 | 94  | 23   | fe(ii)/alpha-ketoglutarate dependent taurine2 dioxygenase from pseudomonas putida kt2440 |

|                        |                                                                                     |             |           |           |                                                                                                 |
|------------------------|-------------------------------------------------------------------------------------|-------------|-----------|-----------|-------------------------------------------------------------------------------------------------|
| <p>Rv3237<br/>c</p>    |    | <p>99.8</p> | <p>66</p> | <p>26</p> | <p>Putative Potassium Channel Related Protein<br/><a href="#">Pyrococcus horikoshii OT3</a></p> |
| <p>FabG4 (Rv0242c)</p> |   | <p>100</p>  | <p>89</p> | <p>99</p> | <p>FabG1 from M. tuberculosis H37Ra</p>                                                         |
| <p>PepC (Rv0800)</p>   |  | <p>100</p>  | <p>98</p> | <p>36</p> | <p>human aspartyl aminopeptidase (dnpep)</p>                                                    |

|               |                                                                                     |     |    |    |                                                                                         |
|---------------|-------------------------------------------------------------------------------------|-----|----|----|-----------------------------------------------------------------------------------------|
| Rv2296        |    | 100 | 99 | 30 | <a href="#">Haloalkane dehalogenase</a> from <a href="#">Xanthobacter autotrophicus</a> |
| Rv2216        |   | 100 | 97 | 32 | human epimerase family protein sdr39u12 (isoform2) with nadph                           |
| CeoB (Rv2691) |  | 100 | 97 | 22 | potassium transporter peripheral membrane component (trka) from vibrio2 vulnificus      |

|        |                                                                                   |          |         |                                                                  |
|--------|-----------------------------------------------------------------------------------|----------|---------|------------------------------------------------------------------|
| Rv3519 | 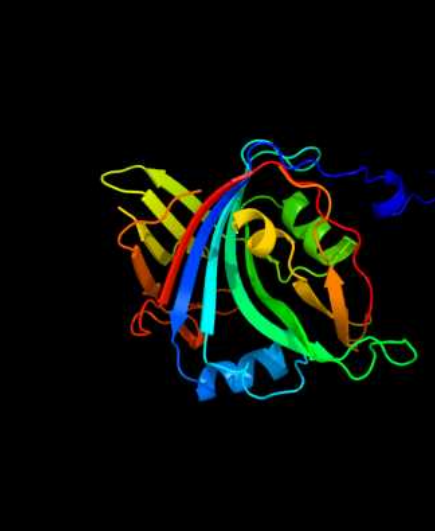 | 100<br>% | 91<br>% | Acetoacetate<br>Decarboxylase<br>(Clostridium<br>acetobutylicum) |
|--------|-----------------------------------------------------------------------------------|----------|---------|------------------------------------------------------------------|

Table S2. Sequenced Genomes Used for Conservation Analysis

| <b>Species</b>                                               | <b>Assembly</b> | <b>Accession</b>            | <b>Size (Mb)</b> | <b>GC%</b> |
|--------------------------------------------------------------|-----------------|-----------------------------|------------------|------------|
| <i>Mycobacterium tuberculosis</i> UT205 chromosome           | Mt_UT205        | <a href="#">NC_016934.1</a> | 4.42             | 64.9       |
| <i>Mycobacterium tuberculosis</i> RGTB423 chromosome         | ASM27710v1      | <a href="#">NC_017528.1</a> | 4.41             | 65.6       |
| <i>Mycobacterium tuberculosis</i> RGTB327 chromosome         | ASM27708v1      | <a href="#">NC_017026.1</a> | 4.38             | 65.6       |
| <i>Mycobacterium tuberculosis</i> KZN1435 chromosome         | ASM2362v1       | <a href="#">NC_012943.1</a> | 4.40             | 65.6       |
| <i>Mycobacterium tuberculosis</i> KZN 4207 chromosome        | ASM15458v2      | <a href="#">NC_016768.1</a> | 4.39             | 65.6       |
| <i>Mycobacterium tuberculosis</i> KZN 605 chromosome         | ASM15460v2      | <a href="#">NC_018078.1</a> | 4.40             | 65.6       |
| <i>Mycobacterium tuberculosis</i> Haarlem/NITR202 chromosome | ASM38990v1      | <a href="#">NC_021192.1</a> | 4.40             | 65.6       |
| <i>Mycobacterium tuberculosis</i> H37Rv chromosome           | ASM19595v2      | <a href="#">NC_000962.3</a> | 4.41             | 65.6       |
| <i>Mycobacterium tuberculosis</i> H37Ra chromosome           | ASM1614v1       | <a href="#">NC_009525.1</a> | 4.42             | 65.6       |
| <i>Mycobacterium tuberculosis</i> F11 chromosome             | ASM1692v1       | NC_009565.1                 | 4.42             | 65.6       |
| <i>Mycobacterium tuberculosis</i> EA15/NITR206 chromosome    | ASM38994v1      | <a href="#">NC_021194.1</a> | 4.39             | 65.6       |
| <i>Mycobacterium tuberculosis</i> CTRI-2 chromosome          | ASM22443v1      | <a href="#">NC_017524.1</a> | 4.40             | 65.6       |
| <i>Mycobacterium tuberculosis</i> CCDC5180 chromosome        | ASM27036v1      | <a href="#">NC_017522.1</a> | 4.41             | 65.6       |
| <i>Mycobacterium tuberculosis</i> CCDC5079 chromosome        | ASM27034v1      | <a href="#">NC_017523.1</a> | 4.40             | 65.6       |
| <i>Mycobacterium tuberculosis</i> CAS/NITR204 chromosome     | ASM38992v1      | <a href="#">NC_021193.1</a> | 4.39             | 65.6       |
| <i>Mycobacterium tuberculosis</i> Beijing/NITR203 chromosome | ASM36482v1      | <a href="#">NC_021054.1</a> | 4.41             | 65.6       |
| <i>Mycobacterium tuberculosis</i> ATCC 35801 chromosome      | ASM35020v1      | <a href="#">NC_020559.1</a> | 4.39             | 65.6       |
| <i>Mycobacterium smegmatis</i> MC2 155                       | ASM1500v1       | <a href="#">NC_008596.1</a> | 6.99             | 67.4       |
| <i>Mycobacterium canettii</i> CIPT 140070008                 | ASM32880v1      | <a href="#">NC_019965.1</a> | 4.43             | 65.6       |
| <i>Mycobacterium bovis</i> AF2122/97                         | ASM19583v1      | <a href="#">NC_002945.3</a> | 4.35             | 65.6       |
| <i>Mycobacterium avium</i> 104                               | ASM1498v1       | <a href="#">NC_008595.1</a> | 5.48             | 69.0       |
| <i>Mycobacterium africanum</i> GMO41182                      | ASM25335v1      | <a href="#">NC_015758.1</a> | 4.39             | 65.6       |
